# Supplementary material for: HDAC inhibitors improve CRISPR-Cas9 mediated prime editing and base editing
Source: PubMed Central journal article supplement — Mol Ther Nucleic Acids. 2022 Jun 2;29:36–46. doi: 10.1016/j.omtn.2022.05.036 (PMC9207553; doi:10.1016/j.omtn.2022.05.036), 2022-06-02
Supplement: mmc1.pdf [file mmc1.pdf]

**OMTN, Volume 29**

**Supplemental information**

**HDAC inhibitors improve CRISPR-Cas9  
mediated prime editing and base editing**

**Nan Liu, Lifang Zhou, Guifeng Lin, Yun Hu, Yaoge Jiao, Yanhong Wang, Jingming Liu, Shengyong Yang, and Shaohua Yao**

| DMSO |     |     |     |    |     |    |     |    |    |     |     |     |     |     |     |     |     |     |     |     |     |     |     |
|------|-----|-----|-----|----|-----|----|-----|----|----|-----|-----|-----|-----|-----|-----|-----|-----|-----|-----|-----|-----|-----|-----|
|      | G1  | T2  | T3  | C4 | A5  | C6 | A7  | C8 | C9 | C10 | A11 | T12 | G13 | A14 | C15 | G16 | A17 | A18 | C19 | A20 | T21 | G22 | G23 |
| T    | 0   | 100 | 100 | 24 | 0   | 33 | 0   | 7  | 8  | 5   | 0   | 100 | 0   | 0   | 0   | 0   | 0   | 0   | 0   | 0   | 100 | 0   | 0   |
| G    | 100 | 0   | 0   | 0  | 0   | 0  | 0   | 0  | 0  | 0   | 0   | 0   | 100 | 0   | 0   | 100 | 0   | 0   | 0   | 0   | 0   | 100 | 100 |
| C    | 0   | 0   | 0   | 73 | 0   | 67 | 0   | 93 | 92 | 95  | 0   | 0   | 0   | 0   | 100 | 0   | 0   | 0   | 100 | 0   | 0   | 0   | 0   |
| A    | 0   | 0   | 0   | 0  | 100 | 0  | 100 | 0  | 0  | 0   | 100 | 0   | 0   | 100 | 0   | 0   | 100 | 100 | 0   | 100 | 0   | 0   | 0   |

  

| Nexturastat A |     |     |     |    |     |    |     |    |    |     |     |     |     |     |     |     |     |     |     |     |     |     |     |
|---------------|-----|-----|-----|----|-----|----|-----|----|----|-----|-----|-----|-----|-----|-----|-----|-----|-----|-----|-----|-----|-----|-----|
|               | G1  | T2  | T3  | C4 | A5  | C6 | A7  | C8 | C9 | C10 | A11 | T12 | G13 | A14 | C15 | G16 | A17 | A18 | C19 | A20 | T21 | G22 | G23 |
| T             | 0   | 100 | 100 | 41 | 0   | 53 | 0   | 12 | 13 | 5   | 0   | 100 | 0   | 0   | 0   | 0   | 0   | 0   | 0   | 0   | 100 | 0   | 0   |
| G             | 100 | 0   | 0   | 0  | 0   | 0  | 0   | 0  | 0  | 0   | 0   | 0   | 100 | 0   | 0   | 100 | 0   | 0   | 0   | 0   | 0   | 100 | 100 |
| C             | 0   | 0   | 0   | 59 | 0   | 47 | 0   | 88 | 87 | 95  | 0   | 0   | 0   | 0   | 100 | 0   | 0   | 0   | 100 | 0   | 0   | 0   | 0   |
| A             | 0   | 0   | 0   | 0  | 100 | 0  | 100 | 0  | 0  | 0   | 100 | 0   | 0   | 100 | 0   | 0   | 100 | 100 | 0   | 100 | 0   | 0   | 0   |

  

| Vorinostat |     |     |     |    |     |    |     |    |    |     |     |     |     |     |     |     |     |     |     |     |     |     |     |
|------------|-----|-----|-----|----|-----|----|-----|----|----|-----|-----|-----|-----|-----|-----|-----|-----|-----|-----|-----|-----|-----|-----|
|            | G1  | T2  | T3  | C4 | A5  | C6 | A7  | C8 | C9 | C10 | A11 | T12 | G13 | A14 | C15 | G16 | A17 | A18 | C19 | A20 | T21 | G22 | G23 |
| T          | 0   | 100 | 100 | 40 | 0   | 52 | 0   | 13 | 14 | 9   | 0   | 100 | 0   | 0   | 0   | 0   | 0   | 0   | 0   | 0   | 100 | 0   | 0   |
| G          | 100 | 0   | 0   | 0  | 0   | 0  | 0   | 0  | 0  | 0   | 0   | 0   | 100 | 0   | 0   | 100 | 0   | 0   | 0   | 0   | 0   | 100 | 100 |
| C          | 0   | 0   | 0   | 60 | 0   | 48 | 0   | 87 | 86 | 91  | 0   | 0   | 0   | 0   | 100 | 0   | 0   | 0   | 100 | 0   | 0   | 0   | 0   |
| A          | 0   | 0   | 0   | 0  | 100 | 0  | 100 | 0  | 0  | 0   | 100 | 0   | 0   | 100 | 0   | 0   | 100 | 100 | 0   | 100 | 0   | 0   | 0   |

  

| Abexinostat |     |     |     |    |     |    |     |    |    |     |     |     |     |     |     |     |     |     |     |     |     |     |     |
|-------------|-----|-----|-----|----|-----|----|-----|----|----|-----|-----|-----|-----|-----|-----|-----|-----|-----|-----|-----|-----|-----|-----|
|             | G1  | T2  | T3  | C4 | A5  | C6 | A7  | C8 | C9 | C10 | A11 | T12 | G13 | A14 | C15 | G16 | A17 | A18 | C19 | A20 | T21 | G22 | G23 |
| T           | 0   | 100 | 100 | 42 | 0   | 53 | 0   | 14 | 15 | 11  | 0   | 100 | 0   | 0   | 0   | 0   | 0   | 0   | 0   | 0   | 100 | 0   | 0   |
| G           | 100 | 0   | 0   | 0  | 0   | 0  | 0   | 0  | 0  | 0   | 0   | 0   | 100 | 0   | 0   | 100 | 0   | 0   | 0   | 0   | 0   | 100 | 100 |
| C           | 0   | 0   | 0   | 58 | 0   | 47 | 0   | 86 | 85 | 89  | 0   | 0   | 0   | 0   | 100 | 0   | 0   | 0   | 100 | 0   | 0   | 0   | 0   |
| A           | 0   | 0   | 0   | 0  | 100 | 0  | 100 | 0  | 0  | 0   | 100 | 0   | 0   | 100 | 0   | 0   | 100 | 100 | 0   | 100 | 0   | 0   | 0   |

**Figure S1. Representative Sanger sequencing results and EditR analysis of site 29 in figure 3a.**

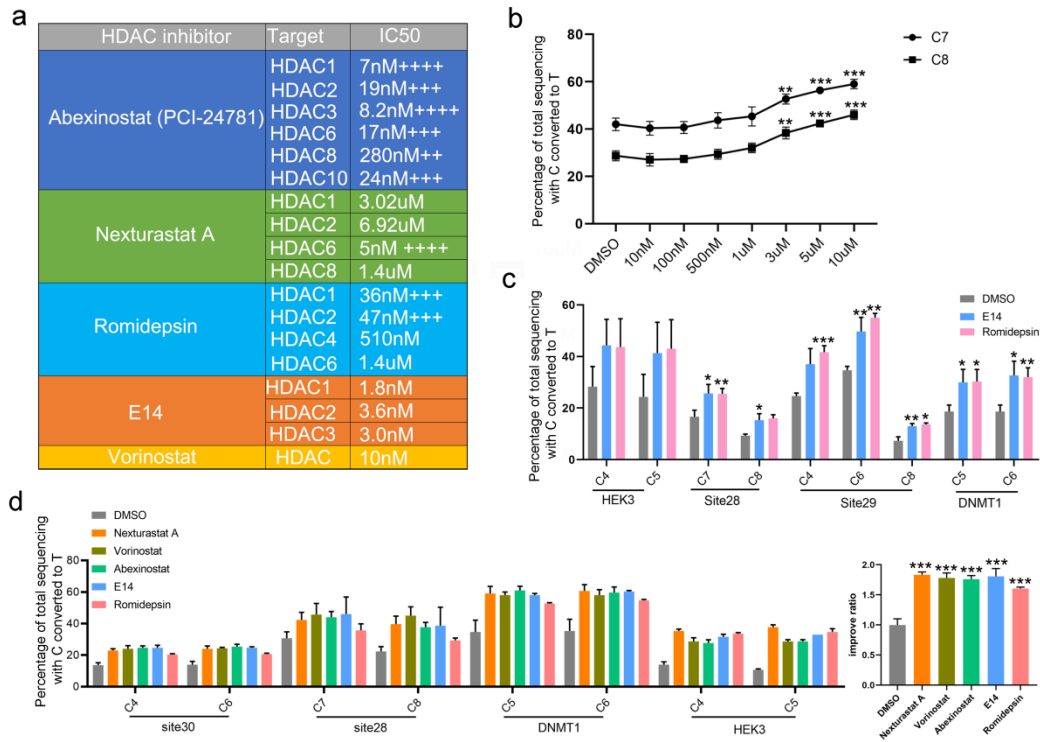

**Figure S2. Detailed analysis of the effect of HDAC inhibitors on cytosine base editing.** **a.** Summarization of the IC50 HDAC profile of inhibitors used in this study. The value of each IC50 was obtained from cell-free assay. **b.** Dose dependent effects of Nexturastat A on cytosine base editing. Nexturastat A can only improve the base editing of BE3 when its concentration exceeded 3 $\mu$ M. **c.** Effects of Romidepsin and E14 on cytosine base editing at 4 endogenous sites. Note that Romidepsin and E14 shared two common targets, HDAC1 and HDAC2. **d.** The comparison of improvement of 5 HDAC inhibitors on cytosine base editing at 4 endogenous sites. Data are represented as mean  $\pm$  SD; Asterisks indicate statistically significant differences between DMSO-treated cells and HDAC inhibitors-treated cells. (\* $p < 0.05$ , \*\* $p < 0.01$ , \*\*\* $p < 0.001$ ).

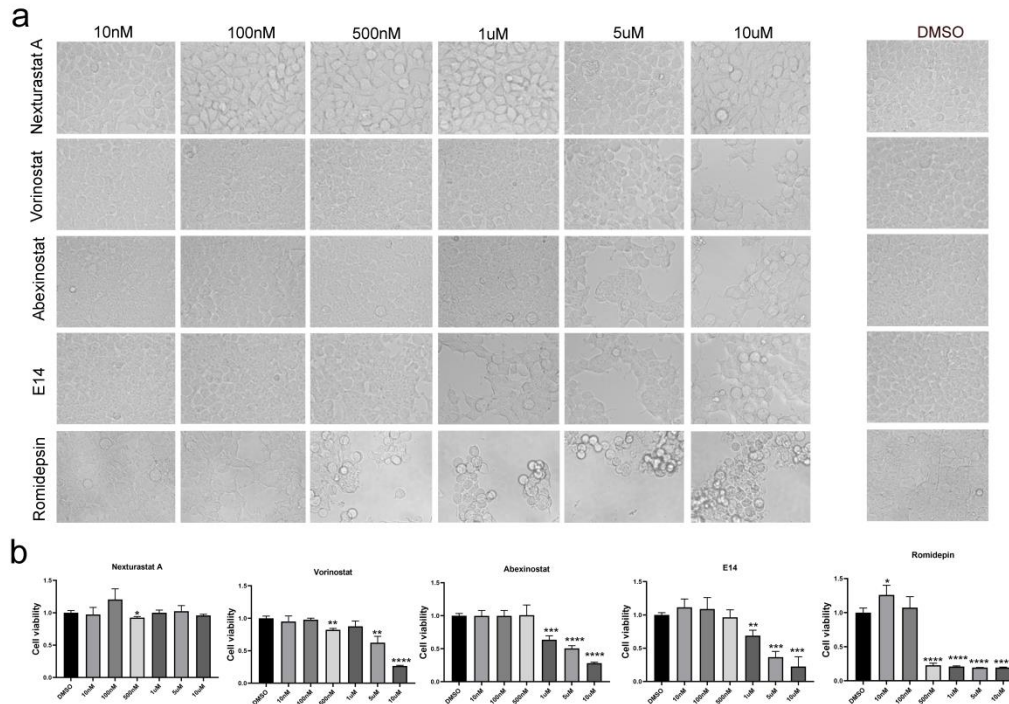

**Figure S3. The cell viability assay of HDAC inhibitors on HEK293T cell line. a.** The images of phenotypic observation of HEK293T cell treated with different HDAC inhibitor. **b.** Cell viability of HEK293T treated with HDAC inhibitors. Promega #G3582 assay was used to determine cell viability. Data are represented as mean  $\pm$  SD; Asterisks indicate statistically significant differences between DMSO-treated cells and HDAC inhibitors-treated cells. (\* $p < 0.05$ , \*\* $p < 0.01$ , \*\*\* $p < 0.001$ ).

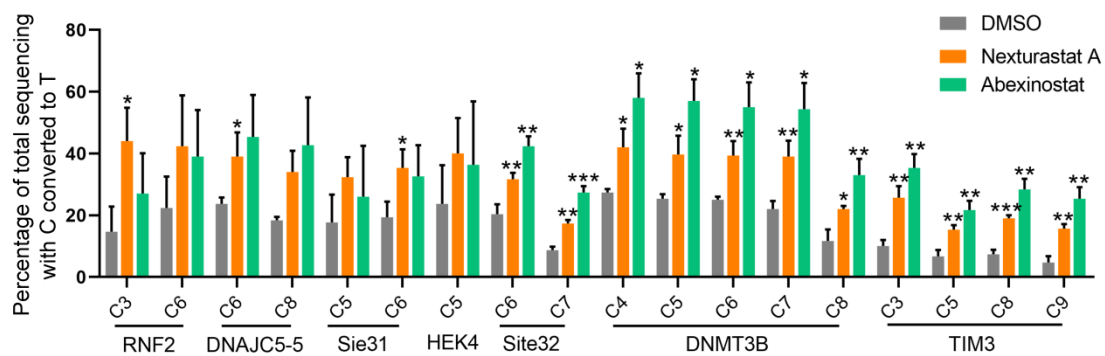

**Figure S4. Effects of Nexturastat A and Abexinostat on cytosine base editing of 7 additional endogenous sites.** The Nexturastat A and Abexinostat improved the C to T base editing efficiency of BE3 across all 7 endogenous sites. Each experiment was repeated at least three times. Data are represented as mean  $\pm$  SD; Asterisks indicate statistically significant differences between DMSO-treated cells and HDAC inhibitors-treated cells. (\* $p < 0.05$ , \*\* $p < 0.01$ , \*\*\* $p < 0.001$ ).

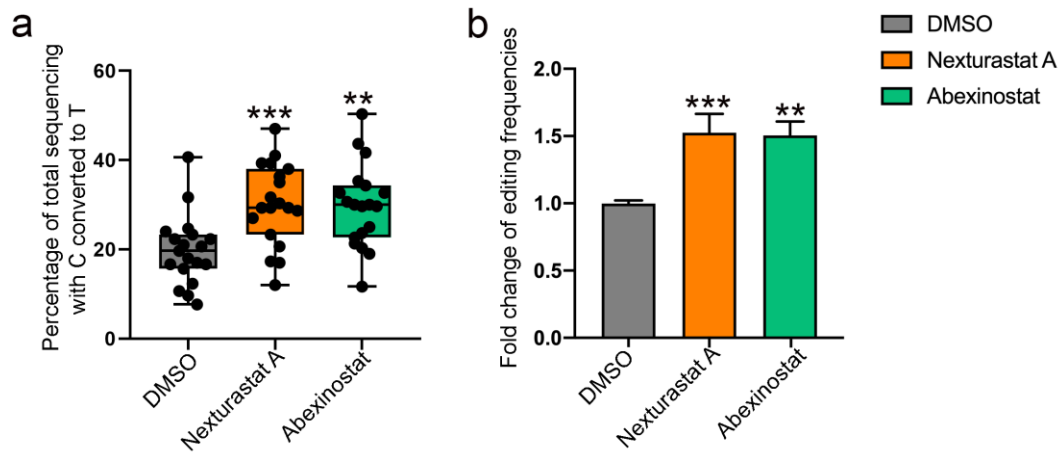

**Figure S5. The total cytosine editing efficiency and the editing ratio of SaCas9 derived CBE across tested 5 endogenous sites.** Each experiment was repeated at least three times. Data are represented as mean  $\pm$  SD; Asterisks indicate statistically significant differences between DMSO-treated cells and HDAC inhibitors-treated cells. (\* $p < 0.05$ , \*\* $p < 0.01$ , \*\*\* $p < 0.001$ )

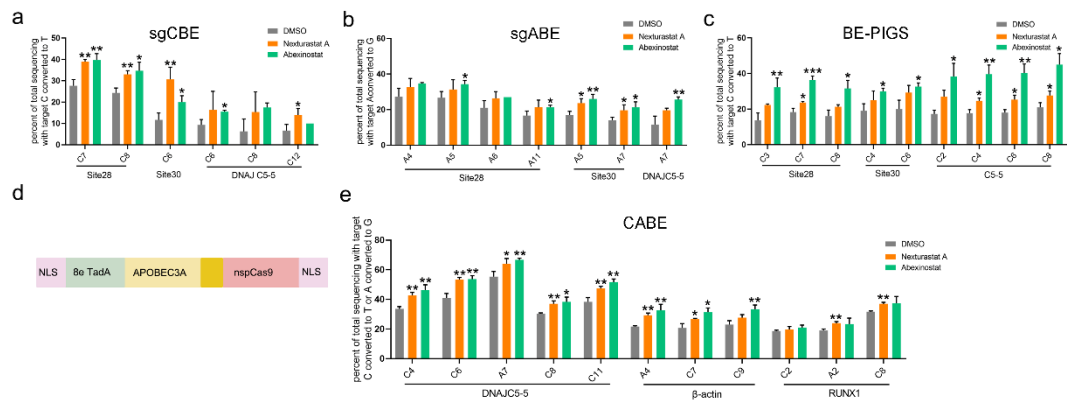

**Figure S6. HDAC inhibitors generally improved the action of a wide range of base editing systems.** Effect of Nexturastat A and Abexinostat on sgCBE (a), sgABE (b), BE-PIGS (c) and SpCas9-CABE (e). d. Schematic diagram of the structure of CABE base editor. 8e TadA and A3A were fused to the N-terminal of nSpCas9. Each experiment was repeated at least three times. Data are represented as mean  $\pm$  SD; Asterisks indicate statistically significant differences between DMSO-treated cells and HDAC inhibitors-treated cells. (\* $p < 0.05$ , \*\* $p < 0.01$ , \*\*\* $p < 0.001$ ).

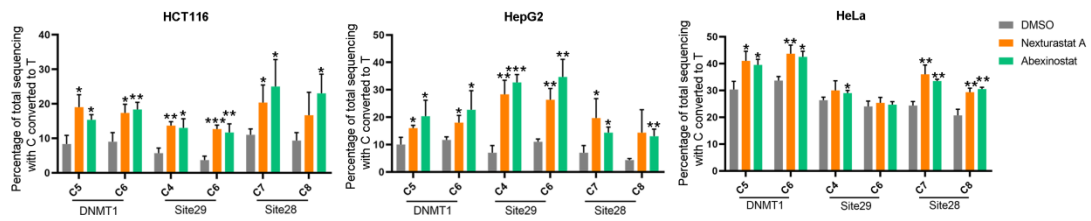

**Figure S7. HDAC inhibitors improved the base editing efficiency in different cell lines.** The effects of Nexturastat A and Abexinostat on the editing of BE3 in HCT116, HepG2 and HeLa cell line. Each experiment was repeated at least three times. Data are represented as mean  $\pm$  SD; Asterisks indicate statistically significant differences between DMSO-treated cells and HDAC inhibitors-treated cells. (\* $p < 0.05$ , \*\* $p < 0.01$ , \*\*\* $p < 0.001$ ).



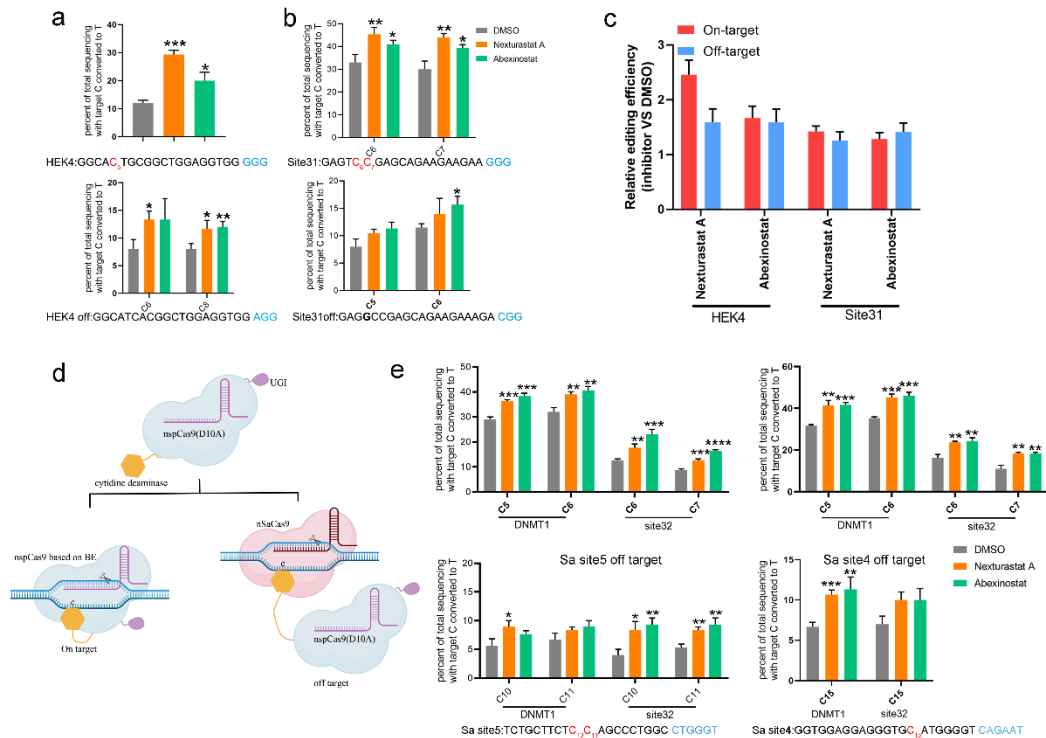

**Figure S8. The effect of HDAC inhibitors on DNA off-target editing.** **a, b.** Sequence-dependent off-target editing were investigated with two previously known off-target sites of HEK4 and site31. Editable Cs in each site were shown in red and mismatched bases within off-target sites were shown in bold (1). **c.** Relative improvement of HDAC inhibitor over DMSO in on-target base editing and off-target base editing. **d.** A diagram showing the mechanism of detecting sequence-independent editing with orthogonal R-loop assay and sequence-independent off-target editing. Two artificial R-loop were generated by transfection of nSaCas9 (D10A) and corresponding sgRNAs. The sequence-independent base editing effects were determined by co-transfection of indicated R-loop constructs and base editors with or without sgRNA. **e.** On target efficiency of DNMT1 and Site32 and their corresponding independent off-target efficiency on Sa site4 and Sa site5 genomic site. Each experiment was repeated at least three times. Data are represented as mean  $\pm$  SD; Asterisks indicate statistically significant differences between DMSO-treated cells and HDAC inhibitors-treated cells. (\* $p < 0.05$ , \*\* $p < 0.01$ , \*\*\* $p < 0.001$ ).

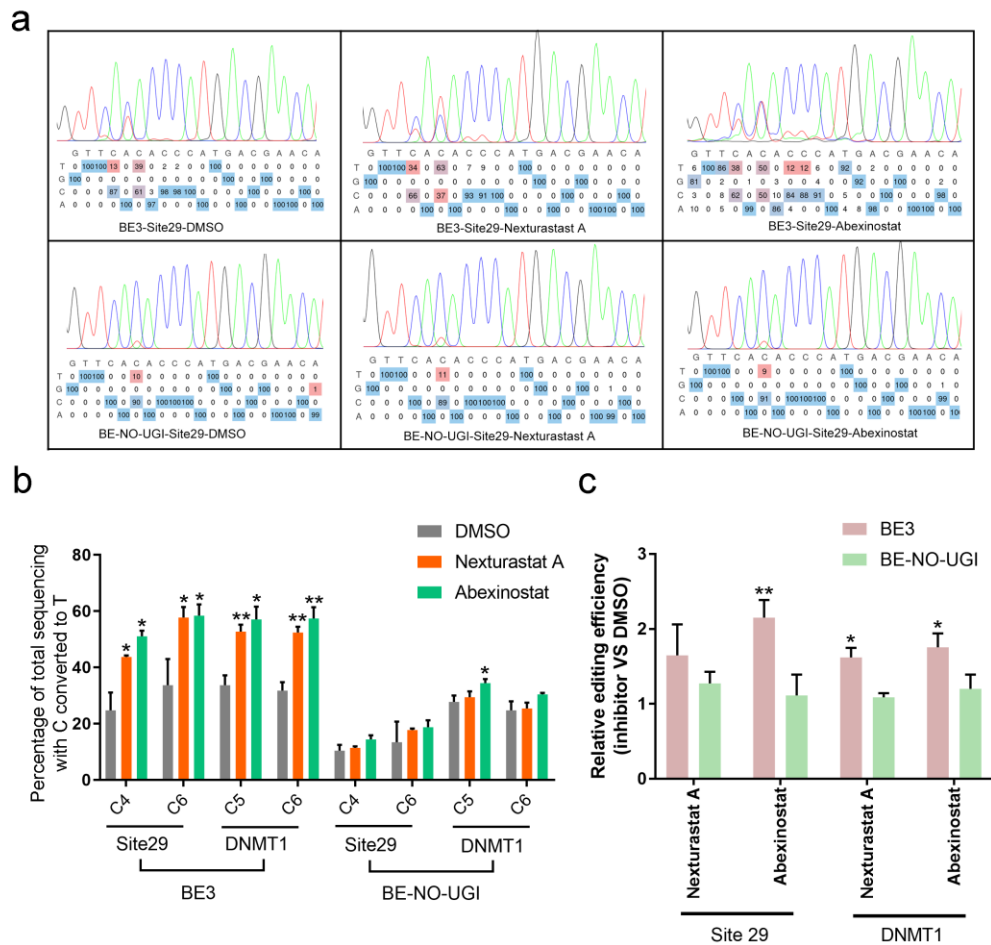

**Figure S9. The effect of HDAC inhibitors on the editing of cytosine base editors with (BE3) or without UGI (BE-NO-UGI). a and b.** The effect of Nexturastat A and Abexinostat on the editing of BE3 and BE-NO-UGI. a. Representative Sanger sequencing results and EditR analysis of site 29. c. Relative improvement of HDAC inhibitor over DMSO in base editing of BE3 and BE-NO-UGI. Each experiment was repeated at least three times. Data are represented as mean  $\pm$  SD; Asterisks indicate statistically significant differences between DMSO-treated cells and HDAC inhibitors-treated cells. (\*p < 0.05, \*\*p < 0.01, \*\*\*p < 0.001).

**Table S1.** List of the 54 drugs used in the screening.

|          | Drug                      | Target                                                                                                                    | Relative editing ratio |
|----------|---------------------------|---------------------------------------------------------------------------------------------------------------------------|------------------------|
| D01-a-2  | I-CBP112 hydrochloride    | Epigenetic Reader Domain inhibitor                                                                                        | 1.10                   |
| D01-a-3  | Tenovin-1                 | Epigenetic Reader Domain inhibitor                                                                                        | 1.17                   |
| D01-a-4  | NSC 42834                 | JAK inhibitor                                                                                                             | 0.77                   |
| D01-a-5  | Doxorubicin hydrochloride | Topoisomerase inhibitor                                                                                                   | 0.71                   |
| D01-a-7  | Docetaxel                 | Bcr-Abl inhibitor; Microtubule Associated inhibitor; Others                                                               | 0.64                   |
| D01-a-8  | Theophylline              | AChR antagonist; HDAC activator; PDE inhibitor                                                                            | 1.10                   |
| D01-a-11 | Curcumin                  | Epigenetic Reader Domain inhibitor; Others                                                                                | 1.09                   |
| D01-b-2  | Zebularine                | DNA Methyltransferase inhibitor                                                                                           | 0.67                   |
| D01-b-4  | Entacapone                | Transferase inhibitor                                                                                                     | 1.00                   |
| D01-b-5  | Resveratrol               | COX inhibitor; DNA/RNA Synthesis inhibitor; IκB/IKK inhibitor; Lipoxygenase inhibitor; NADPH inhibitor; Sirtuin inhibitor | 0.63                   |
| D01-b-7  | Bortezomib (PS-341)       | Proteasome inhibitor                                                                                                      | 0.55                   |
| D01-b-8  | BAY 87-2243               | HIF inhibitor                                                                                                             | 0.53                   |
| D01-b-9  | Vorinostat (SAHA, MK0683) | HDAC inhibitor                                                                                                            | 1.57                   |
| D01-b-10 | Aminophylline             | PDE inhibitor                                                                                                             | 0.67                   |
| D01-b-11 | Daptomycin                | DNA/RNA Synthesis inhibitor                                                                                               | 0.87                   |
| D01-c-3  | BET bromodomain inhibitor | Epigenetic Reader Domain inhibitor                                                                                        | 1.05                   |
| D01-c-4  | AMI-1                     | Histone Methyltransferase inhibitor                                                                                       | 0.80                   |
| D01-c-5  | EPZ6438                   | Histone Methyltransferase inhibitor                                                                                       | 1.33                   |
| D01-c-6  | CUDC-907                  | HDAC inhibitor                                                                                                            | 0.86                   |
| D01-c-7  | Baricitinib (Phosphate)   | JAK inhibitor; Tyrosine Kinases inhibitor                                                                                 | 1.01                   |
| D01-c-8  | SP2509                    | Histone Demethylase inhibitor                                                                                             | 1.00                   |

|          |                            |                                                                                                          |      |
|----------|----------------------------|----------------------------------------------------------------------------------------------------------|------|
| D01-c-9  | SC-514                     | Aurora Kinase inhibitor; CDK inhibitor; IκB/IKK inhibitor; p38 MAPK inhibitor; Serine Protease inhibitor | 1.00 |
| D01-c-10 | PFI-3                      | Epigenetic Reader Domain inhibitor                                                                       | 0.84 |
| D01-c-11 | TCS PIM-1 1                | Pim inhibitor                                                                                            | 1.03 |
| D01-d-2  | PJ34 hydrochloride         | PARP inhibitor                                                                                           | 1.08 |
| D01-d-4  | PCI-24781 (Abexinostat)    | HDAC inhibitor                                                                                           | 1.60 |
| D01-d-5  | Decernotinib(VX-509)       | JAK inhibitor; Tyrosine Kinases inhibitor                                                                | 1.19 |
| D01-d-6  | J147                       | Epigenetic Reader Domain                                                                                 | 1.08 |
| D01-d-7  | SMI-4a                     | Pim inhibitor                                                                                            | 0.87 |
| D01-d-8  | Daphnetin (-)-             | Others inhibitor                                                                                         | 1.13 |
| D01-d-9  | Epigallocatechin Gallate   | EGFR inhibitor; PKA inhibitor; PKC inhibitor                                                             | 1.52 |
| D01-d-10 | Curcumol                   | JAK inhibitor                                                                                            | 1.30 |
| D01-d-11 | Sodium Aescinate           | HIF inhibitor                                                                                            | 0.98 |
| D01-e-3  | Imatinib (STI571)          | Bcr-Abl inhibitor; c-Kit inhibitor; PDGFR inhibitor                                                      | 1.01 |
| D01-e-4  | GSK J4 hydrochloride       | Histone Demethylase inhibitor                                                                            | 0.76 |
| D01-e-5  | Procarbazine hydrochloride | DNA/RNA Synthesis inhibitor                                                                              | 1.01 |
| D01-e-6  | Methotrexate (R)-          | Dehydrogenase inhibitor                                                                                  | 1.21 |
| D01-e-7  | Ruxolitinib (INCB018424)   | JAK inhibitor                                                                                            | 1.52 |
| D01-e-8  | Belinostat (PXD101)        | HDAC inhibitor                                                                                           | 1.11 |
| D01-e-9  | Momelotinib (CYT387)       | JAK inhibitor                                                                                            | 1.33 |
| D01-e-10 | Picropodophyllin (PPP)     | Adenosine Receptor antagonist; Aurora Kinase inhibitor                                                   | 1.27 |
| D01-e-11 | IOX 2                      | HIF/HIF Prolyl-Hydroxylase inhibitor                                                                     | 1.05 |
| D01-f-2  | Nexturastat A              | HDAC inhibitor                                                                                           | 2.06 |
| D01-f-4  | JW55                       | PPAR inhibitor                                                                                           | 1.35 |
| D01-f-5  | WHI-P258                   | EGFR inhibitor; JAK inhibitor                                                                            | 1.13 |
|          | SKLB-681                   | SETDB1 inhibitor                                                                                         | 1.17 |

|                    |                  |      |
|--------------------|------------------|------|
| <i>cis</i> -24b    | SETDB1 inhibitor | 1.08 |
| ( <i>R,R</i> )-32b | SETDB1 inhibitor | 1.24 |
| ( <i>R,R</i> )-59  | SETDB1 inhibitor | 1.12 |
| ( <i>S,S</i> )-45  | SETDB1 inhibitor | 1.53 |
| SKLB-A011          | ATM inhibitor    | 0.94 |
| XAJ-A017           | ATM inhibitor    | 0.98 |
| AZD1390            | ATM inhibitor    | 1.58 |
| AZD0156            | ATM inhibitor    | 1.38 |

**Table S2. List of Sequences of pegRNAs.**

| pegRN                          | spacer sequence           | 3'extension                                                                                                             | PBS length (nt) | RT template length(nt) |
|--------------------------------|---------------------------|-------------------------------------------------------------------------------------------------------------------------|-----------------|------------------------|
| $\beta$ -actin<br>+2 C to<br>A | GGCTATTCTCG<br>CAGCTCACCA | TCGACGACGAGCGCGG<br>CGATATCATCATCCATAG<br>TGAGCTGCGAGAA                                                                 | 13              | 34                     |
| $\beta$ -actin<br>+1<br>KI36   | GGCTATTCTCG<br>CAGCTCACCA | TCGACGACGAGCGCGG<br>CGATATCATCATCCATGG<br>AGCCGCAGCACCCCTGG<br>ACAGCAAGGCATGGAA<br>GCTTTGAGCTGCGAGAA                    | 13              | 40                     |
| $\beta$ -actin<br>del1-40      | GGCTATTCTCG<br>CAGCTCACCA | CGTCGCCCCGCGAAGCCG<br>GCCTTGACATGCCGGA<br>TGAGCTGCGAGAA                                                                 | 13              | 41                     |
| DNMT<br>1+1<br>KI27            | GATTCCTGGTG<br>CCAGAAACA  | AGGAGGAGGAAGCTGC<br>TAAGGACTAGTTCTGCC<br>CTCCCGTCACCCCTGTC<br>TTGTAATCCATGGATCCG<br>AGCTCGGT                            | 11              | 76                     |
| DNMT<br>1 del1-<br>24          | GATTCCTGGTG<br>CCAGAAACA  | TAAATAAAGGAGGAG<br>GAAGCTGCTAAGGACTA<br>TTCTGGCACCAGG                                                                   | 11              | 33                     |
| DNMT<br>1+6 G<br>to C          | GATTCCTGGTG<br>CCAGAAACA  | GTCACGCCTGTTTCTGG<br>CACCAGG                                                                                            | 11              | 13                     |
| VEGFA<br>+1<br>KI40            | GATGTCTGCAG<br>GCCAGATGA  | AGGGGCCACAGTGTGTC<br>CCTCTGACAATGTGCCA<br>TCTGGAGCCCTCACTCG<br>CTGCTCCCTGGGGCTAG<br>CAGCGAGACAGGGGAT<br>CCTCTGGCCTGCAGA | 13              | 87                     |
| VEGFA                          | GATGTCTGCAG               | AGTTGCTTCATGTACAG                                                                                                       | 13              | 33                     |

|                       |                          |                                                                                                         |    |    |
|-----------------------|--------------------------|---------------------------------------------------------------------------------------------------------|----|----|
| del1-50               | GCCAGATGA                | AGAGCCCAGGGCTGGG<br>TCTGGCCTGCAGA                                                                       |    |    |
| VEGFA<br>+5 G to<br>C | GATGTCTGCAG<br>GCCAGATGA | AATGTGCCATCTGGAGC<br>ACTCATCTGGCCTGCAG<br>A                                                             | 13 | 22 |
| HEK3<br>+1<br>KI40    | GGCCCAGACT<br>GAGCACGTGA | TGGAGGAAGCAGGGCT<br>TCCTTTCCTCTGCCATCA<br>ATAACTTCGTATAATGTA<br>TGCTATACGAAGTTATAA<br>CAATCGTGCTCAGTCTG | 13 | 74 |
| HEK3d<br>el1-40       | GGCCCAGACT<br>GAGCACGTGA | AGGAGCTGCACATACTA<br>GCCCTGTCTAGGAAAA<br>GCTGTCCTGCGACCGTG<br>CTCAGTCTG                                 | 13 | 47 |
| HEK3+<br>3 A to C     | GGCCCAGACT<br>GAGCACGTGA | TGGAGGAAGCAGGGCT<br>TCCTTTCCTCTGCCACC<br>ACGTGCTCAGTCTG                                                 | 13 | 34 |

**Table S3. List of sgRNAs and Oligos sequence**

| sgRNA          | target sequence                         | Oligo F                            | Oligo R                           | Reference  |
|----------------|-----------------------------------------|------------------------------------|-----------------------------------|------------|
| Site31         | GAGTCCGAGC<br>AGAAGAAGAA<br><b>GGG</b>  | CACCGAGTCC<br>GAGCAGAAGA<br>AGAA   | AAACTTCTTC<br>TTCTGCTCGG<br>ACTC  | (2)        |
| RNF2           | GTCATCTTAGT<br>CATTACCTG<br><b>AGG</b>  | CACCGTCATCT<br>TAGTCATTACC<br>TG   | AAACCAGGT<br>AATGACTAA<br>GATGAC  | (2)        |
| DNAJ<br>C5-5   | GCGCTCACTGT<br>CTACCTCTG<br><b>GGG</b>  | CACCGCGCTC<br>ACTGTCTACCT<br>CTG   | AAACCAGAG<br>GTAGACAGT<br>GAGCGC  | (3)        |
| $\beta$ -actin | GCTATTCTCGC<br>AGCTCACCA<br><b>TGG</b>  | CACCGCTATTC<br>TCGCAGCTCA<br>CCA   | AAACTGGTG<br>AGCTGCGAG<br>AATAGC  | This study |
| SiteE          | CACACACACAC<br>TTAGAATCTG<br><b>TGG</b> | CACCGCACAC<br>ACACACTTAG<br>AATCTG | AAACCAGAT<br>TCTAAGTGTG<br>TGTGTG | (4)        |
| HEK4           | GGCACTGCGGC<br>TGGAGGTGG<br><b>GGG</b>  | CACCGGCACT<br>GCGGCTGGAG<br>GTGG   | AAACCCACC<br>TCCAGCCGC<br>AGTGCC  | (5)        |
| Site30         | GAACACAAAG<br>CATAGACTGC<br><b>GGG</b>  | CACCGAACAC<br>AAAGCATAGA<br>CTGC   | AAACGCAGT<br>CTATGCTTTG<br>TGTTT  | (2)        |
| Site28         | GACAAACCAG<br>AAGCCGCTCC                | CACCGACAAA<br>CCAGAAGCCG           | AAACGGAGC<br>GGCTTCTGGT           | (6)        |

|          |                 |              |            |            |
|----------|-----------------|--------------|------------|------------|
|          | <b>TGG</b>      | CTCC         | TTGTC      |            |
| Sa       | GATGTTCCAAT     | CACCGATGTTTC | AAACTGCGT  | (7)        |
| Site6    | CAGTACGCA       | CAATCAGTACG  | ACTGATTGG  |            |
|          | <b>GAGAGT</b>   | CA           | AACATC     |            |
| HEK3     | GGCCCAGACTG     | CACCGGCCCA   | AAACTCACG  | (8)        |
|          | AGCACGTGA       | GACTGAGCAC   | TGCTCAGTCT |            |
|          | <b>TGG</b>      | GTGA         | GGGCC      |            |
| Site29   | G TTCACACCCA    | CACCGTTCAC   | AAACTGTTC  | This study |
|          | TGACGAACA       | ACCCATGACG   | GTCATGGGT  |            |
|          | <b>TGG</b>      | AACA         | GTGAAC     |            |
| DNMT     | GATTCCTGGTG     | CACCGATTCCT  | AAACTGTTTC | (8)        |
| 1        | CCAGAAACA       | GGTGCCAGAA   | TGGCACCAG  |            |
|          | <b>GGG</b>      | ACA          | GAATC      |            |
| VEGF     | ATGTACAGAGA     | CACCGATGTAC  | AAACGCCCT  | This study |
| A3       | GCCCAGGGC       | AGAGAGCCCA   | GGGCTCTCT  |            |
|          | <b>TGG</b>      | GGGC         | GTACAT C   |            |
| VEGF     | GATGTCTGCAG     | CACCGATGTCT  | AAACTCATCT | (8)        |
| A1       | GCCAGATGA       | GCAGGCCAGA   | GGCCTGCAG  |            |
|          | <b>GGG</b>      | TGA          | ACATC      |            |
| Site32   | GAAGACCAAG      | CACCGAAGAC   | AAACGCAGT  | (6)        |
|          | GATAGACTGC      | CAAGGATAGA   | CTATCCTTGG |            |
|          | <b>TGG</b>      | CTGC         | TCTTC      |            |
| RUNX     | GCATTTTCAGG     | CACCGCATTTT  | TCGCTTCCTC | (8)        |
| 1        | AGGAAGCGA       | CAGGAGGAAG   | CTGAAAATG  |            |
|          | <b>TGG</b>      | CGA          | C          |            |
| HEK2     | GTTAAGAACAC     | CACCGTTAAG   | AAACCCTTTA | This study |
| site2    | GTTTAAAGG       | AACACGTTTAA  | AACGTGTTCT |            |
|          | <b>GGG</b>      | AGG          | TAAC       |            |
| VEGF     | GCTCCATTCAC     | CACCGCTCCAT  | AAACGGGAA  | This study |
| A11      | CCAGCTTCCC      | TCACCCAGCTT  | GCTGGGTGA  |            |
|          | <b>TGTGGT</b>   | CCC          | ATGGAGC    |            |
| EXM1-    | CCTCCCTCCCT     | CACCGCCTCCC  | AAACACCTG  | (9)        |
| 1        | GGCCCAGGT       | TCCCTGGCCCA  | GGCCAGGGA  |            |
|          | <b>GAAGGT</b>   | GGT          | GGGAGGC    |            |
| RUNX     | GTACTCACCTC     | CACCGTACTCA  | AAACAGTGC  | (9)        |
| 14       | TCATGAAGCAC     | CCTCTCATGAA  | TTCATGAGA  |            |
|          | <b>T GTGGGT</b> | GCACT        | GGTGAGTAC  |            |
| HEK3-    | GTACTCACCTC     | CACCGTACTCA  | AAACAGTGC  | (2)        |
| 2        | TCATGAAGCAC     | CCTCTCATGAA  | TTCATGAGA  |            |
|          | <b>T GTGGGT</b> | GCACT        | GGTGAGTAC  |            |
| HEK3-    | TCTGCTTCTCC     | CACCGTCTGCT  | AAACGCCAG  | (2)        |
| 1        | AGCCCTGGC       | TCTCCAGCCCT  | GGCTGGAGA  |            |
|          | <b>CTGGGT</b>   | GGC          | AGCAGAC    |            |
| Sa site4 | GGTGGAGGAG      | CACCGGTGGA   | AAACACCCC  | (7)        |

|          |             |             |               |
|----------|-------------|-------------|---------------|
|          | GGTGCATGGGG | GGAGGGTGCA  | ATGCACCCTC    |
|          | T CAGAAT    | TGGGGT      | CTCCACC       |
| Sa site5 | TCTGCTTCTCC | CACCGTCTGCT | AAACGCCAG (7) |
|          | AGCCCTGGC   | TCTCCAGCCCT | GGCTGGAGA     |
|          | CTGGGT      | GGC         | AGCAGAC       |

**Table S4. Primers used to amplify each target sites for sanger sequencing**

| Target site    | chromosome | Forward primer            | Reverse primer             |
|----------------|------------|---------------------------|----------------------------|
| Site31         | Chr2       | CAGCTCAGCCTGA<br>GTGTTGA  | CTCGTGGGTTTGTGG<br>TTGC    |
| RNF2           | Chr1       | ACCACTG TTCACC<br>CAGTACC | TCCCTTCCAAATACT<br>AAAATTG |
| DNAJC5-5       | Chr20      | TCTGTCTGTGCAC<br>GTGGCAA  | AGCTGTGACCAGTTC<br>AACGC   |
| $\beta$ -actin | Chr7       | GACCCGGCGCTGT<br>TTGAA    | AAAGCGCCCTTGCCT<br>CC      |
| SiteE          | Chr1       | TTCGAGGTGGAGC<br>TCAAGAT  | TTCTGCAGGCGAGA<br>ACCTG    |
| HEK4           | Chr20      | CAGCGAGGTCAAA<br>GTCACC   | TCCTTTCAACCCGAA<br>CGGAG   |
| Site30         | Chr5       | ACAGGCTACCCCC<br>TAAGT    | TCCCAAGTGAGAAG<br>CCAGTG   |
| Site28         | Chr3       | GGCACAAAGGATG<br>AAGGCT   | GCTCAGTCTTGCATG<br>AAACAC  |
| Sa site6       | Chr11      | ATGACTGGCATCAT<br>CTCGCA  | GGTGCTGACGTAGGT<br>AGTGC   |
| HEK3           | Chr9       | TGGGTCACAGTGG<br>CAAATGA  | ATGCAGGTGCTGAAA<br>GCCAC   |
| Site29         | Chr12      | CAAAGAAAGAGG<br>GAGCGGGG  | GCTGAGTACGTCGTG<br>GAGTC   |
| DNMT1          | Chr19      | AGTCCCGTGCAAA<br>TCACGAA  | CCGTGAACGTTCCCT<br>TAGCA   |
| VEGFA<br>site3 | Chr6       | GGAACAAGGGCCT<br>CTGTCTG  | GCCGTTCCCTCTTTG<br>CTAGG   |
| VEGFA<br>site1 | Chr6       | GGAACAAGGGCCT<br>CTGTCTG  | GCCGTTCCCTCTTTG<br>CTAGG   |
| Site32         | Chr22      | TTCCAACCTTCCC<br>ACAGG    | GGGCATCATAGCGAG<br>AC      |
| RUNX1          | Chr21      | GTTCTCACGCACC<br>GACTGAA  | GAGTCCCAGAGGTAT<br>CCAGC   |
| HEK2 site2     | Chr5       | ACAGGCTACCCCC<br>TAAGT    | TCCCAAGTGAGAAG<br>CCAGTG   |
| VEGFA11        | Chr5       | GGAACAAGGGCCT<br>CTGTCTG  | GCCGTTCCCTCTTTG<br>CTAGG   |



|          |       |                          |                           |
|----------|-------|--------------------------|---------------------------|
| EXM1-1   | Chr2  | AATCTACCACCCC<br>AGGCTCT | GCCCCTAACCCCTATG<br>TAGCC |
| RUNX14   | Chr21 | GTTCTCACGCACC<br>GACTGAA | GAGTCCCAGAGGTAT<br>CCAGC  |
| HEK3-2   | Chr9  | AGAATGGGTCACA<br>GTGGCAA | TAGGAAAAGCTGTCC<br>TGCGA  |
| HEK3-1   | Chr9  | AGAATGGGTCACA<br>GTGGCAA | TAGGAAAAGCTGTCC<br>TGCGA  |
| Sa site4 | Chr1  | AGGAACAACCTGT<br>CCGCAAG | AGGCATACACTCCTG<br>GCATC  |
| Sa site5 | Chr9  | AGAATGGGTCACA<br>GTGGCA  | TAGGAAAAGCTGTCC<br>TGCGA  |

**Table S5. HTS Primers used to amplify each target sites.**

| sample name                              | Primer Name | Sequence                     |
|------------------------------------------|-------------|------------------------------|
| DNMT1+1 KI 27-DMSO                       | HTS-1-for   | GTGAACA accacacatgtgaacggaca |
|                                          | HTS-1-rev   | CGTGTTC CCCAGAGTGACTT        |
| DNMT1+1 KI 27-<br>Nexturastat A          | HTS-2-for   | GTGACTC accacacatgtgaacggaca |
|                                          | HTS-2-rev   | CGTGTTC CCCAGAGTGACTT        |
| DNMT1+1 KI 27-Vorinostat                 | HTS-3-for   | GTGTCAA accacacatgtgaacggaca |
|                                          | HTS-3-rev   | CGTGTTC CCCAGAGTGACTT        |
| DNMT1+1 KI 27-<br>Abexinostat            | HTS-4-for   | AACTGTC accacacatgtgaacggaca |
|                                          | HTS-4-rev   | CGTGTTC CCCAGAGTGACTT        |
| DNMT1 del 1-24-DMSO                      | HTS-5-for   | AAGTCAG accacacatgtgaacggaca |
|                                          | HTS-5-rev   | CGTGTTC CCCAGAGTGACTT        |
| DNMT1 del 1-24-<br>Nexturastat A         | HTS-6-for   | ATCAGTG accacacatgtgaacggaca |
|                                          | HTS-6-rev   | CGTGTTC CCCAGAGTGACTT        |
| DNMT1 del 1-24-Vorinostat                | HTS-7-for   | ATCTGCT accacacatgtgaacggaca |
|                                          | HTS-7-rev   | CGTGTTC CCCAGAGTGACTT        |
| DNMT1 del 1-24-<br>Abexinostat           | HTS-8-for   | ATGTGAC accacacatgtgaacggaca |
|                                          | HTS-8-rev   | CGTGTTC CCCAGAGTGACTT        |
| $\beta$ -actin +1 KI36-DMS               | HTS-9-for   | CTGATGT cccctggcggccta       |
|                                          | HTS-9-rev   | CACGATGGAGGGGAAGACG          |
| $\beta$ -actin +1 KI36-Nexturastat<br>A  | HTS-10-for  | CTGTAGA cccctggcggccta       |
|                                          | HTS-10-rev  | CACGATGGAGGGGAAGACG          |
| $\beta$ -actin +1 KI36-Vorinostat        | HTS-11-for  | GAACACT cccctggcggccta       |
|                                          | HTS-11-rev  | CACGATGGAGGGGAAGACG          |
| $\beta$ -actin +1 KI36-Abexinostat       | HTS-12-for  | GATCTCA cccctggcggccta       |
|                                          | HTS-12-rev  | CACGATGGAGGGGAAGACG          |
| $\beta$ -actin del 1-40-DMSO             | HTS-13-for  | GACTACA cccctggcggccta       |
|                                          | HTS-13-rev  | CACGATGGAGGGGAAGACG          |
| $\beta$ -actin del 1-40-Nexturastat<br>A | HTS-14-for  | GACTCAC cccctggcggccta       |
|                                          | HTS-14-rev  | CACGATGGAGGGGAAGACG          |
| $\beta$ -actin del 1-40-Vorinostat       | HTS-15-for  | GAGTCGT cccctggcggccta       |

|                              |            |                             |
|------------------------------|------------|-----------------------------|
|                              | HTS-15-rev | CACGATGGAGGGGAAGACG         |
| β-actin del 1-40-Abexinostat | HTS-16-for | GTACAGA cccctggcggccta      |
|                              | HTS-16-rev | CACGATGGAGGGGAAGACG         |
| VEGFA+1 KI40nt-DMSO          | HTS-17-for | CACACTGccaaaggaccccagtcactc |
|                              | HTS-17-rev | TGGGACTGGAGTTGCTTCAT        |
| VEGFA+1 KI40-Nexturastat     | HTS-18-for | CACTTGAccaaaggaccccagtcactc |
| A                            | HTS-18-rev | TGGGACTGGAGTTGCTTCAT        |
| VEGFA+1 KI40-Vorinostat      | HTS-19-for | CACTGATccaaaggaccccagtcactc |
|                              | HTS-19-rev | TGGGACTGGAGTTGCTTCAT        |
| VEGFA+1 KI40-Abexinostat     | HTS-20-for | CAGATCAccaaaggaccccagtcactc |
|                              | HTS-20-rev | TGGGACTGGAGTTGCTTCAT        |
| VEGFA del1-50-DMSO           | HTS-21-for | CAGTACTccaaaggaccccagtcactc |
|                              | HTS-21-rev | TGGGACTGGAGTTGCTTCAT        |
| VEGFA del1-50-Nexturastat    | HTS-22-for | CAGTCTAccaaaggaccccagtcactc |
| A                            | HTS-22-rev | TGGGACTGGAGTTGCTTCAT        |
| VEGFA del1-50-Vorinostat     | HTS-23-for | CTAGACAccaaaggaccccagtcactc |
|                              | HTS-23-rev | TGGGACTGGAGTTGCTTCAT        |
| VEGFA del1-50-Abexinostat    | HTS-24-for | CTTGAGTccaaaggaccccagtcactc |
|                              | HTS-24-rev | TGGGACTGGAGTTGCTTCAT        |
| HEK3 del 1-40-DMSO           | HTS-41-for | TCAGAGAtgcattttaggcttgatgc  |
|                              | HTS-41-rev | GTCAACCAGTATCCCGGTGC        |
| HEK3 del 1-40-Nexturastat    | HTS-42-for | TGACTGAtgcattttaggcttgatgc  |
| A                            | HTS-42-rev | GTCAACCAGTATCCCGGTGC        |
| HEK3 del 1-40-Vorinostat     | HTS-43-for | TGAGACTtgcattttaggcttgatgc  |
|                              | HTS-43-rev | GTCAACCAGTATCCCGGTGC        |
| HEK3 del 1-40-Abexinostat    | HTS-44-for | TGTCAGTtgcattttaggcttgatgc  |
|                              | HTS-44-rev | GTCAACCAGTATCCCGGTGC        |

**Table S6. List of off-target sites**

| Target site       | sequence             |
|-------------------|----------------------|
| HEK4 off Target   | GGCATCACGGCTGGAGGTGG |
| Site31 off Target | GAGGCCGAGCAGAAGAAAGA |

**Table S7. primers used for amplifying off-target sites**

| Sample name       | Forward primer       | Reverse primer       |
|-------------------|----------------------|----------------------|
| HEK4 off Target   | CAGGTGTTTCAGCTTTGCCA | AGTAGAGACAGGCCAAGA   |
| Site31 off Target | TGCAGGAGCTAGACTCCGA  | TCCTCGTCCTGCTCTCACTT |

## References

1. Komor, A.C., Y.B. Kim, M.S. Packer, J.A. Zuris, and D.R. Liu. (2016). Programmable editing of a target base in genomic DNA without double-stranded

- DNA cleavage. *Nature*. **533**(7603): p. 420-4.
2. Komor, A.C., K.T. Zhao, M.S. Packer, N.M. Gaudelli, A.L. Waterbury, L.W. Koblan, Y.B. Kim, A.H. Badran, and D.R. Liu. (2017). Improved base excision repair inhibition and bacteriophage Mu Gam protein yields C:G-to-T:A base editors with higher efficiency and product purity. *Sci Adv*. **3**(8): p. eaao4774.
  3. Yao, X., X. Liu, Y. Zhang, Y. Li, C. Zhao, S. Yao, and Y.J.H.G.T. Wei. (2017). Gene therapy of adult neuronal ceroid lipofuscinoses with CRISPR/Cas9 in Zebrafish. *28*(7): p. 588-597.
  4. Cheng, T.-L., S. Li, B. Yuan, X. Wang, W. Zhou, and Z.J.N.c. Qiu. (2019). Expanding C–T base editing toolkit with diversified cytidine deaminases. **10**(1): p. 1-10.
  5. Koblan, L.W., J.L. Doman, C. Wilson, J.M. Levy, T. Tay, G.A. Newby, J.P. Maianti, A. Raguram, and D.R. Liu. (2018). Improving cytidine and adenine base editors by expression optimization and ancestral reconstruction. *Nat Biotechnol*. **36**(9): p. 843-846.
  6. Huang, T.P., K.T. Zhao, S.M. Miller, N.M. Gaudelli, B.L. Oakes, C. Fellmann, D.F. Savage, and D.R. Liu. (2019). Circularly permuted and PAM-modified Cas9 variants broaden the targeting scope of base editors. *Nat Biotechnol*. **37**(6): p. 626-631.
  7. Doman, J.L., A. Raguram, G.A. Newby, and D.R.J.N.B. Liu. (2020). Evaluation and minimization of Cas9-independent off-target DNA editing by cytosine base editors. **38**(5): p. 620-628.
  8. Anzalone, A.V., P.B. Randolph, J.R. Davis, A.A. Sousa, L.W. Koblan, J.M. Levy, P.J. Chen, C. Wilson, G.A. Newby, A. Raguram, et al. (2019). Search-and-replace genome editing without double-strand breaks or donor DNA. *Nature*. **576**(7785): p. 149-157.
  9. Kleinstiver, B.P., M.S. Prew, S.Q. Tsai, N.T. Nguyen, V.V. Topkar, Z. Zheng, and J.K. Joung. (2015). Broadening the targeting range of *Staphylococcus aureus* CRISPR-Cas9 by modifying PAM recognition. *Nat Biotechnol*. **33**(12): p. 1293-1298.
